# Supplementary material for: Self-assembling few-layer MoS2 nanosheets on a CNT backbone for high-rate and long-life lithium-ion batteries
Source: Royal Society of Chemistry journal article supplement (doi:10.1039/c4ra08604j), 2014-01-01
Supplement: c4ra08604j1.pdf [file c4ra08604j1.pdf]

## Supporting Information

### **Self-assembling few-layer MoS<sub>2</sub> nanosheets on CNT backbone for high-rate and long-life lithium-ion batteries**

*Dayong Ren, Hao Jiang,\* Yanjie Hu, Ling Zhang, Chunzhong Li\**

Key Laboratory for Ultrafine Materials of Ministry of Education, School of Materials Science  
and Engineering, East China University of Science and Technology, Shanghai 200237, China

Tel.: +86-21-64250949, Fax: +86-21-64250624

E-mail: [jianghao@ecust.edu.cn](mailto:jianghao@ecust.edu.cn) (H. Jiang) and [czli@ecust.edu.cn](mailto:czli@ecust.edu.cn) (C. Z. Li)

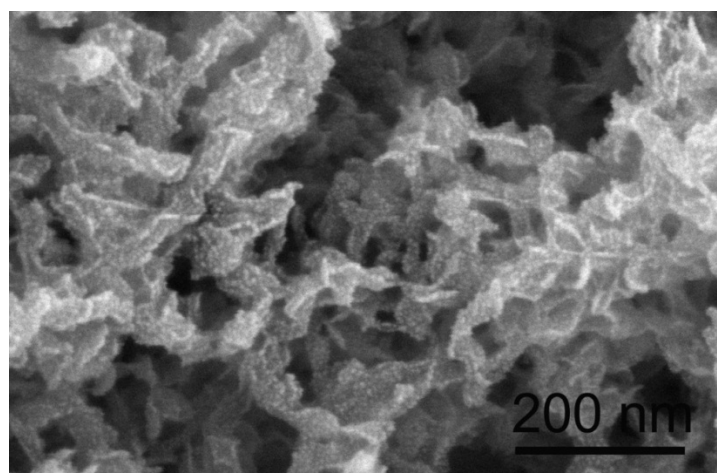

**Fig.S1** FESEM images of the fresh MoS<sub>2</sub>/CNTs hybrids.

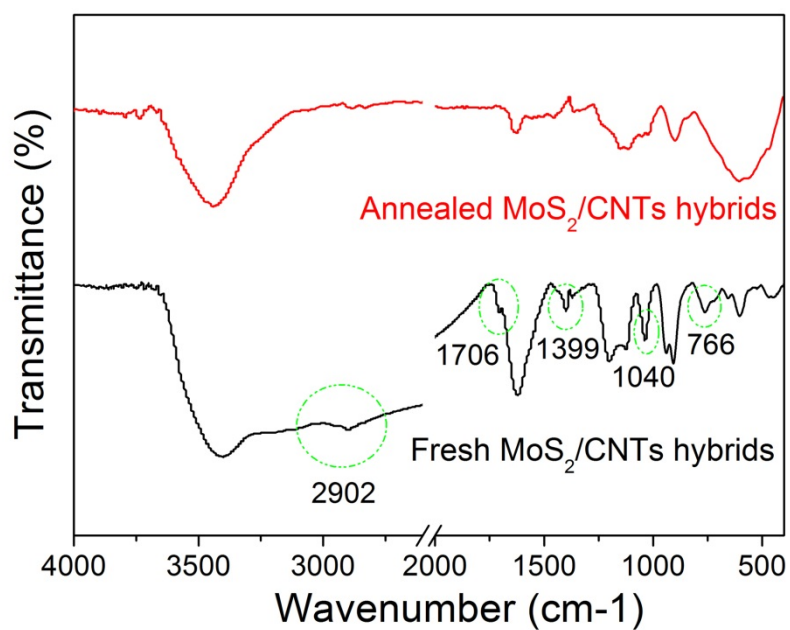

**Fig.S2** FTIR spectra of the annealed MoS<sub>2</sub>/CNTs hybrids (red line) and the fresh MoS<sub>2</sub>/CNTs hybrids (black line), respectively.

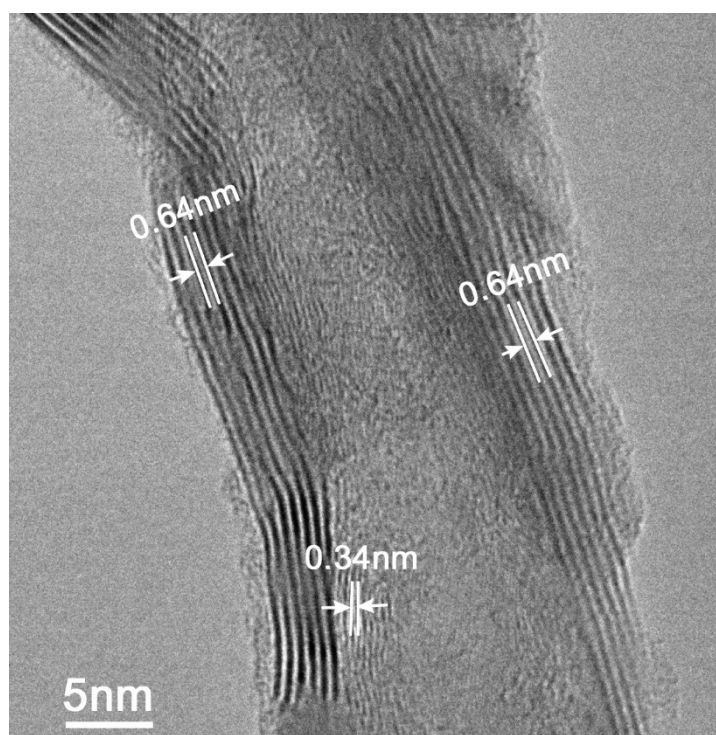

**Fig. S3** High-resolution TEM images of the annealed MoS<sub>2</sub>/CNTs hybrids at 800 °C for 2 h.

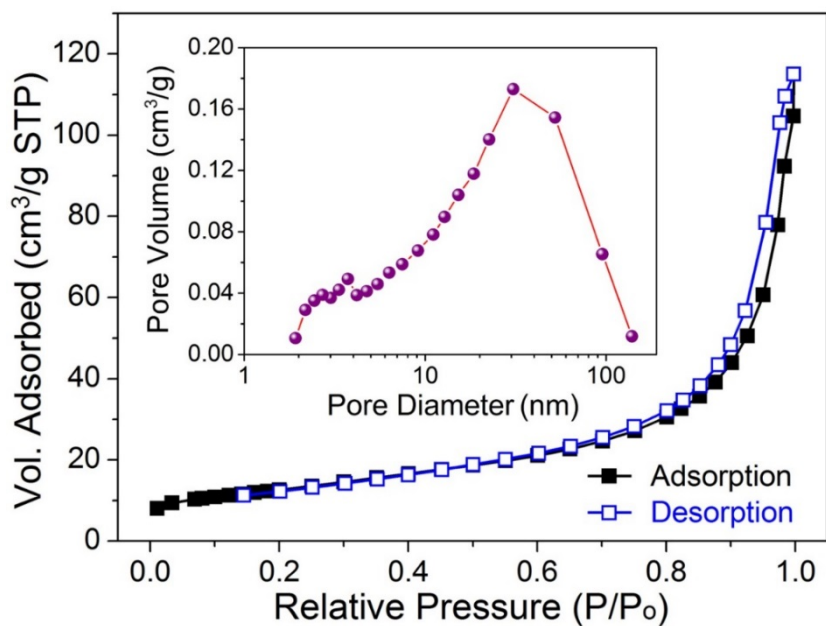

**Fig. S4** Nitrogen adsorption-desorption isotherms and PSD (inset) of the annealed MoS<sub>2</sub>/CNTs hybrids.

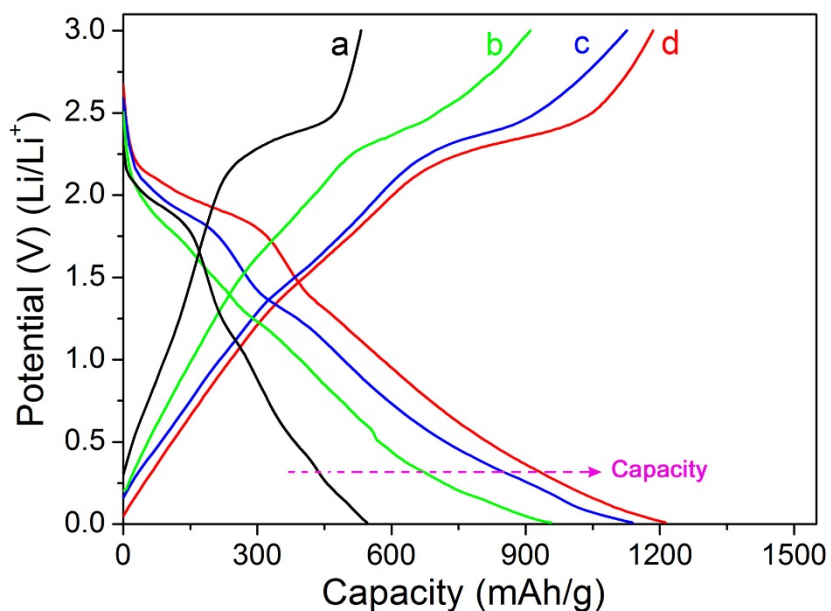

**Fig. S5** The relationship between discharge capacity and the MoS<sub>2</sub>/CNTs hybrids with different MoS<sub>2</sub> content (a) commercial MoS<sub>2</sub>, (b) MoS<sub>2</sub>:CNTs = 69:31, (c) MoS<sub>2</sub>:CNTs = 75:25, (d) MoS<sub>2</sub>:CNTs = 85:15.

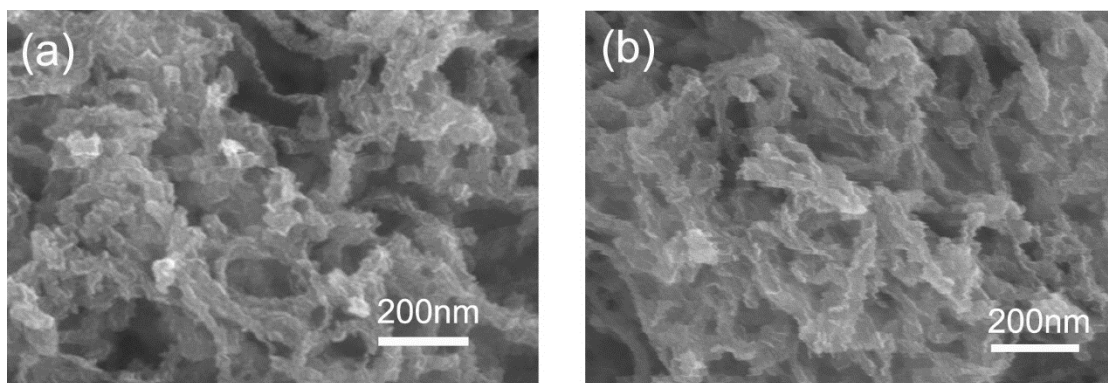

**Fig. S6** The FESEM images of the MoS<sub>2</sub>/CNTs hybrids with different MoS<sub>2</sub> content: (a)

MoS<sub>2</sub>/CNTs = 69:31, (b) MoS<sub>2</sub>/CNTs = 75:25
